RETRACTION

## Retraction: A new compound of thiophenylated pyridazinone IMB5043 showing potent antitumor efficacy through ATM-Chk2 pathway

The *PLOS One* Editors

After publication of this article [1], concerns were raised regarding Figs 3, 5, and S1. Specifically, the following panels appear similar to each other:

- S1 Fig phospho-ATR in [1] and P-IkBa lanes 1-4 in [2]
- S1 Fig ATR in [1] and p65 lanes 1-4 in Fig 3A in [2].
- Fig 3 phosph-p53 in [1] and Fig 5C cleaved caspase-3 in [1]
- Fig 3 Phospho-ATM and P-STAT3 HCT-116 lanes 2-5 in Fig 4C in a later article by a different author group [4] when flipped.

First author JG stated that the Fig 3 p-ATM panel is incorrect, which invalidates key findings of the article [1] as this panel does not correspond to the SMMC-7721 cells treated with IMB5043 as described, and that therefore, this error invalidates the key data supporting the article's core conclusion regarding IMB5043 activating the ATM-Chk2 pathway.

Regarding the above concerns with S1 Fig, the first author stated that these were due to inadvertent use of the same raw image file for two different experimental conditions, but they were unable to clarify whether these panels are correct as the images underlying S1 Fig are no longer available. The first author also stated that the Fig 3 phosph-p53 panel is incorrect and the Fig 5C cleaved caspase-3 panel is correct, but that the underlying blots for Fig 5C are no longer available.

During post-publication discussions, original western blot images were provided for Fig 3; however, these do not appear to match the corresponding panels in [1].

In addition, during post-publication reassessment of this article, the following cell lines reported in this study have been identified as either contaminated or misclassified:

- The SMMC7721 cell line reported as a human hepatocellular carcinoma cell line in this study [1] has been identified as a contaminated cell line that was previously shown to be a HeLa derivative instead [5,6].
- The HepG2 cell line reported as a human hepatocellular carcinoma cell line in this study [1] has been identified as a misclassified cell line that was previously shown to originate from a hepatoblastoma instead [7].

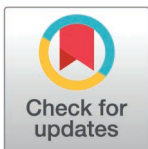

### OPEN ACCESS

**Citation:** The *PLOS One* Editors (2026) Retraction: A new compound of thiophenylated pyridazinone IMB5043 showing potent antitumor efficacy through ATM-Chk2 pathway. *PLoS One* 21(4): e0347912. <https://doi.org/10.1371/journal.pone.0347912>

**Published:** April 27, 2026

**Copyright:** © 2026 The *PLOS One* Editors. This is an open access article distributed under the terms of the [Creative Commons Attribution License](https://creativecommons.org/licenses/by/4.0/), which permits unrestricted use, distribution, and reproduction in any medium, provided the original author and source are credited.

In light of the above concerns, which call into question the integrity and reliability of the results in [1], the *PLOS One* Editors retract this article.

JG did not respond to the final editorial decision. YZheng, YW, WS, YL, XL, SS, RS, and YZhen either did not respond directly or could not be reached.

After publication of this article [1], it was also raised that Fig 5A 1 $\mu$ M in [1] appears similar to Fig 5D NC in a later article by a different author group [3].

## References

1. Gong J, Zheng Y, Wang Y, Sheng W, Li Y, Liu X, et al. RETRACTED: A new compound of thiophenylated pyridazinone IMB5043 showing potent antitumor efficacy through ATM-Chk2 pathway. *PLoS One*. 2018;13(2):e0191984. <https://doi.org/10.1371/journal.pone.0191984> PMID: [29394294](https://pubmed.ncbi.nlm.nih.gov/29394294/)
2. Zhao X, Qi X, Lian W, Tong X, Wang H, Su L, et al. Trichomicin Suppresses Colorectal Cancer via Comprehensive Regulation of IL-6 and TNF $\alpha$  in Tumor Cells, TAMs, and CAFs. *Front Pharmacol*. 2020;11. <https://doi.org/10.3389/fphar.2020.00386>
3. Cheng Y, Yu H, Yang S, Tian X, Zhao M, Ren L, et al. Enhancing the Therapeutic Efficacy of Berberine and Quercetin Through Salt Formulation for Liver Fibrosis Treatment. *Int J Mol Sci*. 2025;26(5):2193. <https://doi.org/10.3390/ijms26052193> PMID: [40076811](https://pubmed.ncbi.nlm.nih.gov/40076811/)
4. Zhu F, Zhao X, Li J, Guo L, Bai L, Qi X. A new compound Trichomicin exerts antitumor activity through STAT3 signaling inhibition. *Biomed Pharmacother*. 2020;121:109608. <https://doi.org/10.1016/j.biopha.2019.109608> PMID: [31707338](https://pubmed.ncbi.nlm.nih.gov/31707338/)
5. Ye F, Chen C, Qin J, Liu J, Zheng C. Genetic profiling reveals an alarming rate of cross-contamination among human cell lines used in China. *FASEB J*. 2015;29(10):4268–72. <https://doi.org/10.1096/fj.14-266718> PMID: [26116706](https://pubmed.ncbi.nlm.nih.gov/26116706/)
6. Rebouissou S, Zucman-Rossi J, Moreau R, Qiu Z, Hui L. Note of caution: Contaminations of hepatocellular cell lines. *J Hepatol*. 2017;67(5):896–7. <https://doi.org/10.1016/j.jhep.2017.08.002> PMID: [28807831](https://pubmed.ncbi.nlm.nih.gov/28807831/)
7. López-Terrada D, Cheung SW, Finegold MJ, Knowles BB. Hep G2 is a hepatoblastoma-derived cell line. *Hum Pathol*. 2009;40(10):1512–5. <https://doi.org/10.1016/j.humpath.2009.07.003> PMID: [19751877](https://pubmed.ncbi.nlm.nih.gov/19751877/)
